# Supplementary material
Source: PubMed Central journal article supplement (PMC3976223)
Supplement: supp_blood-2012-11-466482_blood-2012-11-466482-1.pdf [file supp_blood-2012-11-466482_blood-2012-11-466482-1.pdf]

**Supplemental Table1** - Number of Patients by Molecular Response at Study Time-points

|               | <b>At CR</b> | <b>3mos</b> | <b>6mos</b> | <b>9 mos</b> | <b>12 mos</b> |
|---------------|--------------|-------------|-------------|--------------|---------------|
| <b>CMR</b>    | 13           | 26          | 21          | 22           | 17            |
| <b>MMR</b>    | 23           | 26          | 26          | 21           | 16            |
| <b>No MMR</b> | 26           | 6           | 8           | 4            | 4             |

**Legend** – CR: complete response; mos: months; CMR: complete molecular response; MMR: Major molecular response

**Figure 5 (Supplement)** – Survival by comparing patients achieving CMR, to those with MMR at different time points. None of the P values are significant when comparing these 2 subgroups.

Figure 5a - Supplement

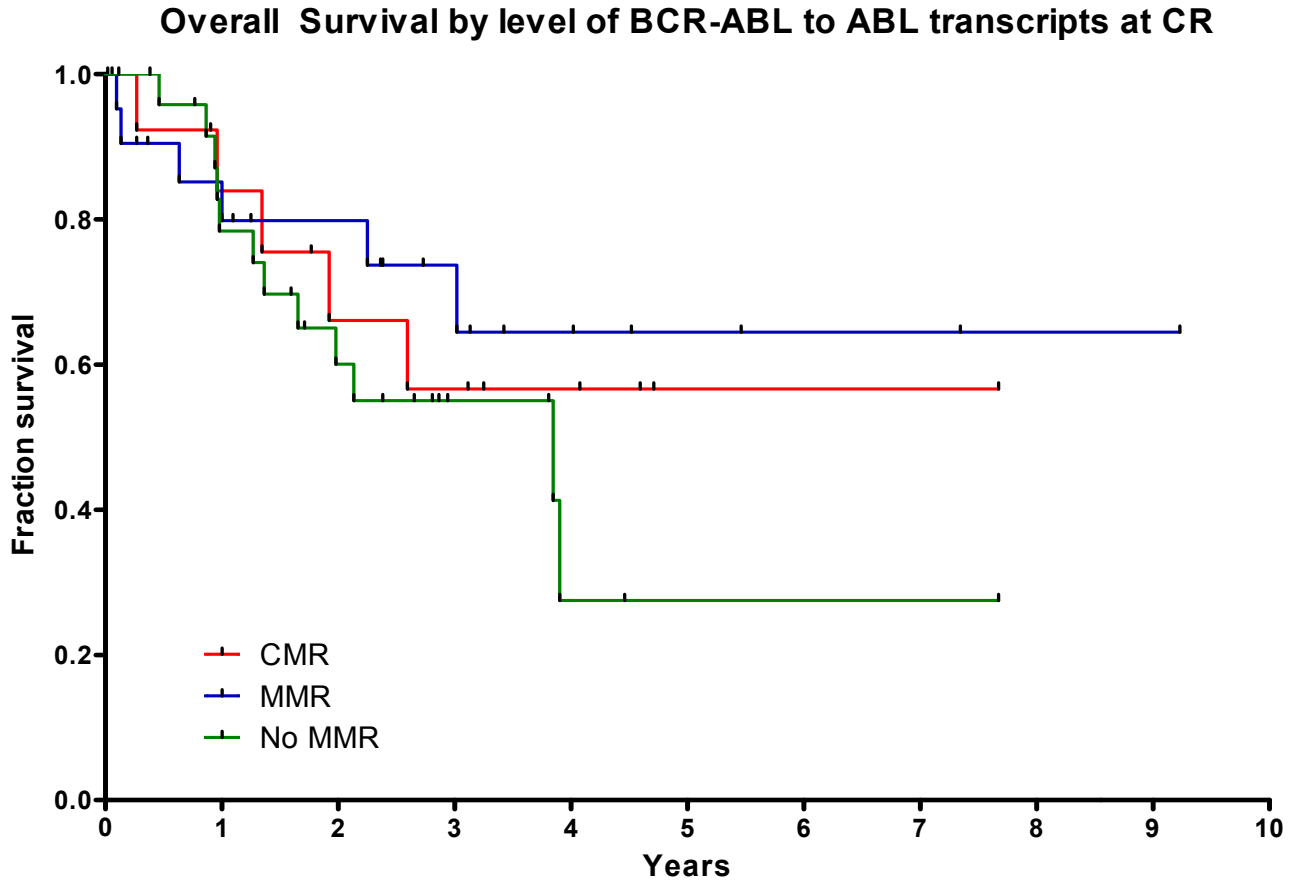

Figure 5b - Supplement

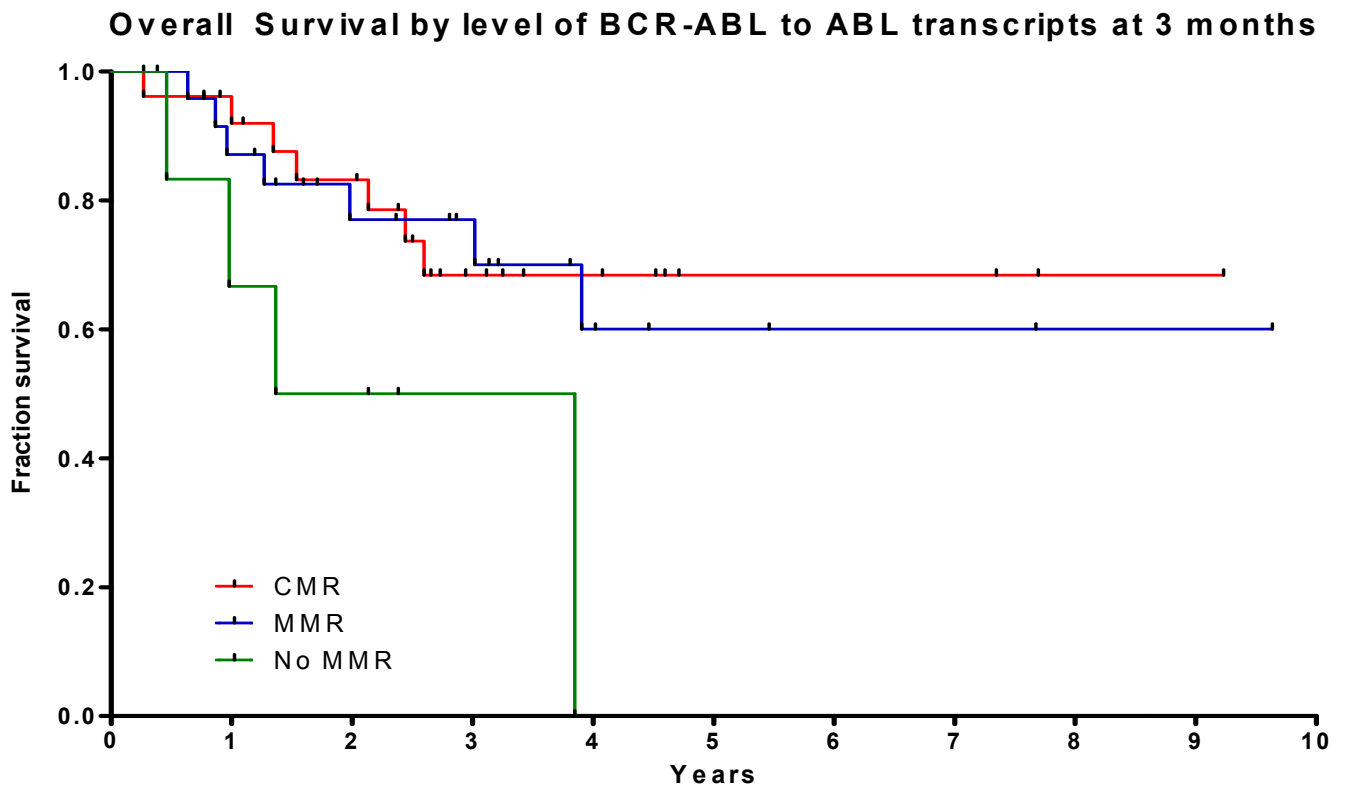

Figure 5c - Supplement

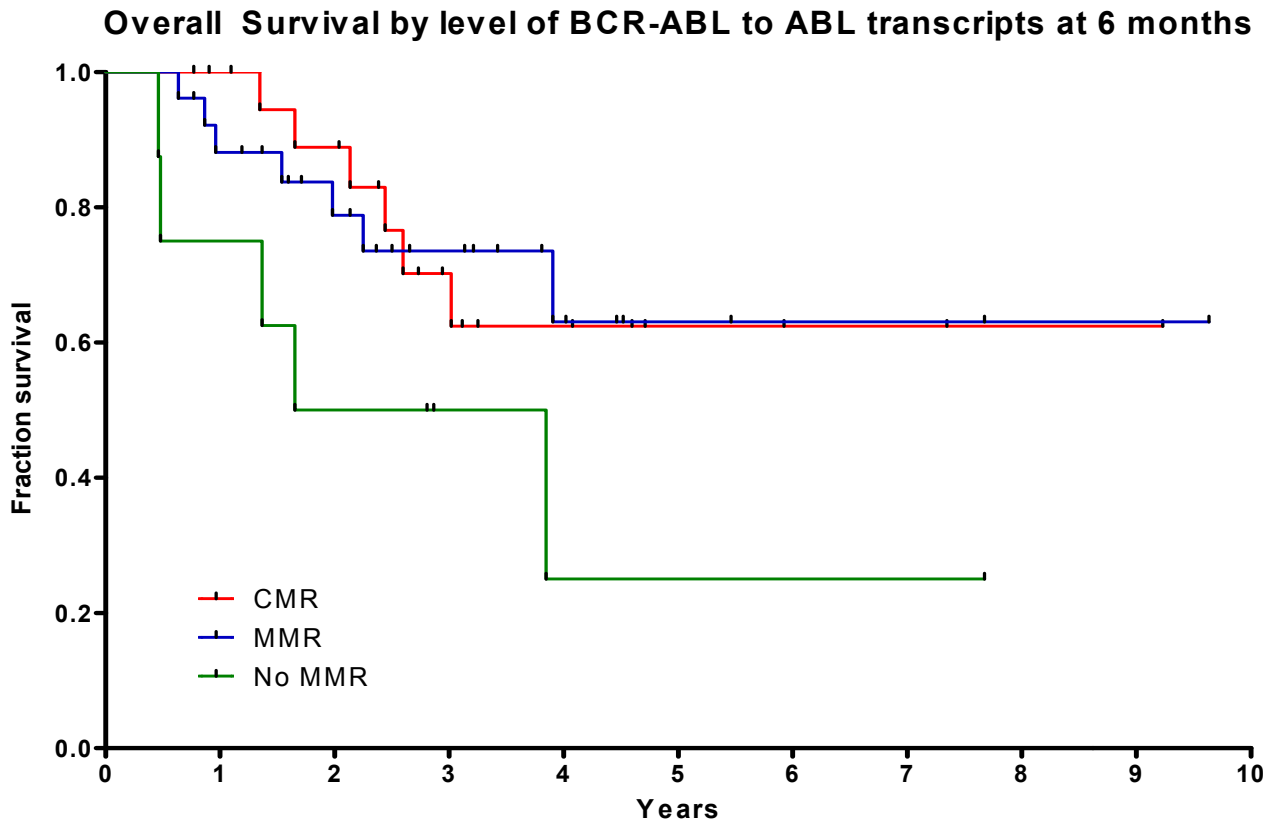

Figure 5d - Supplement

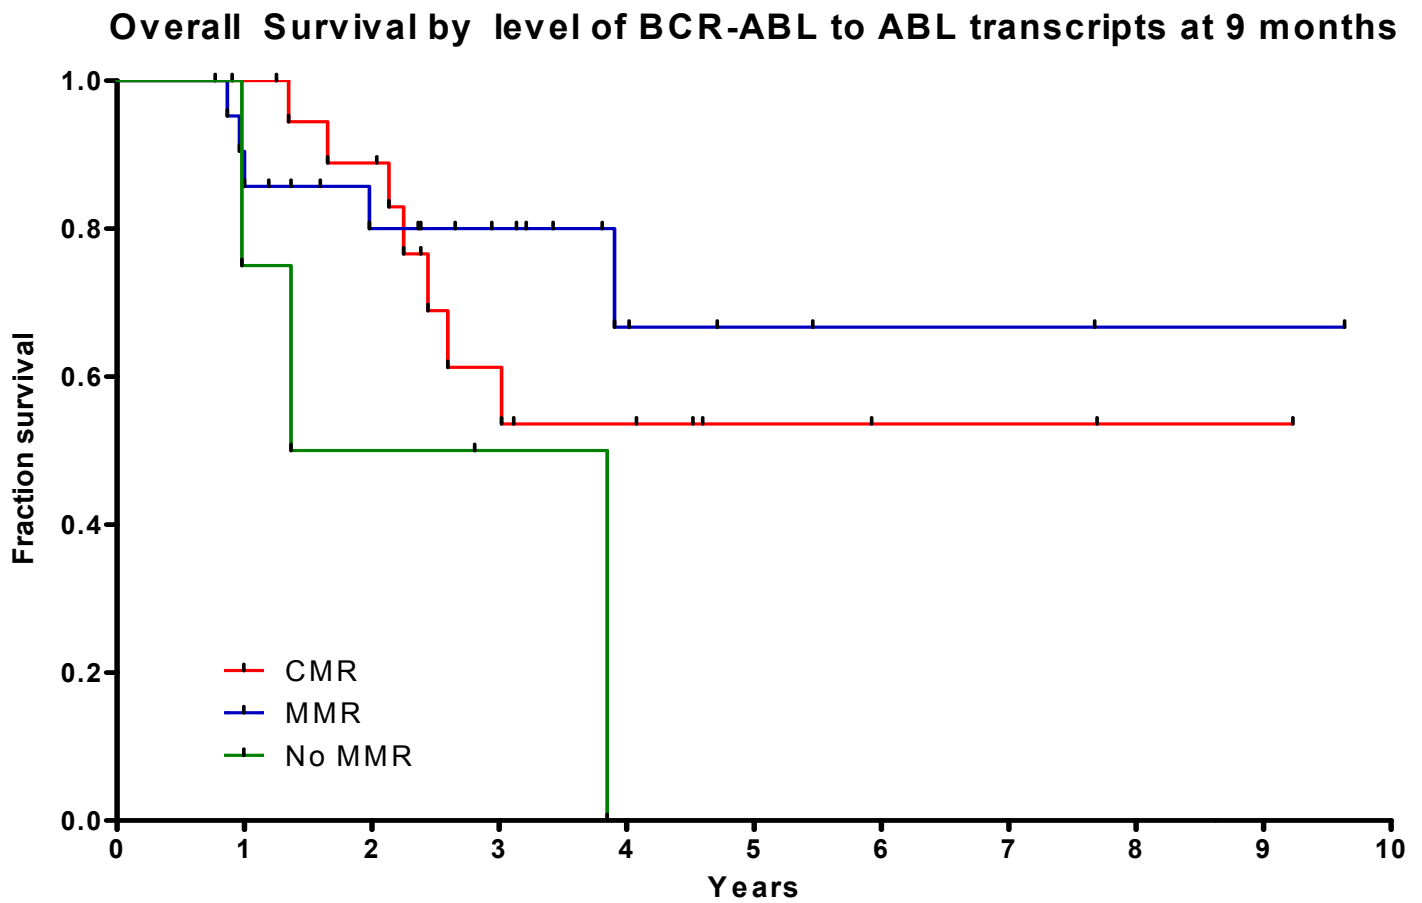

Figure 5e - Supplement

### Overall Survival by level of BCR-ABL to ABL transcripts at 12 months

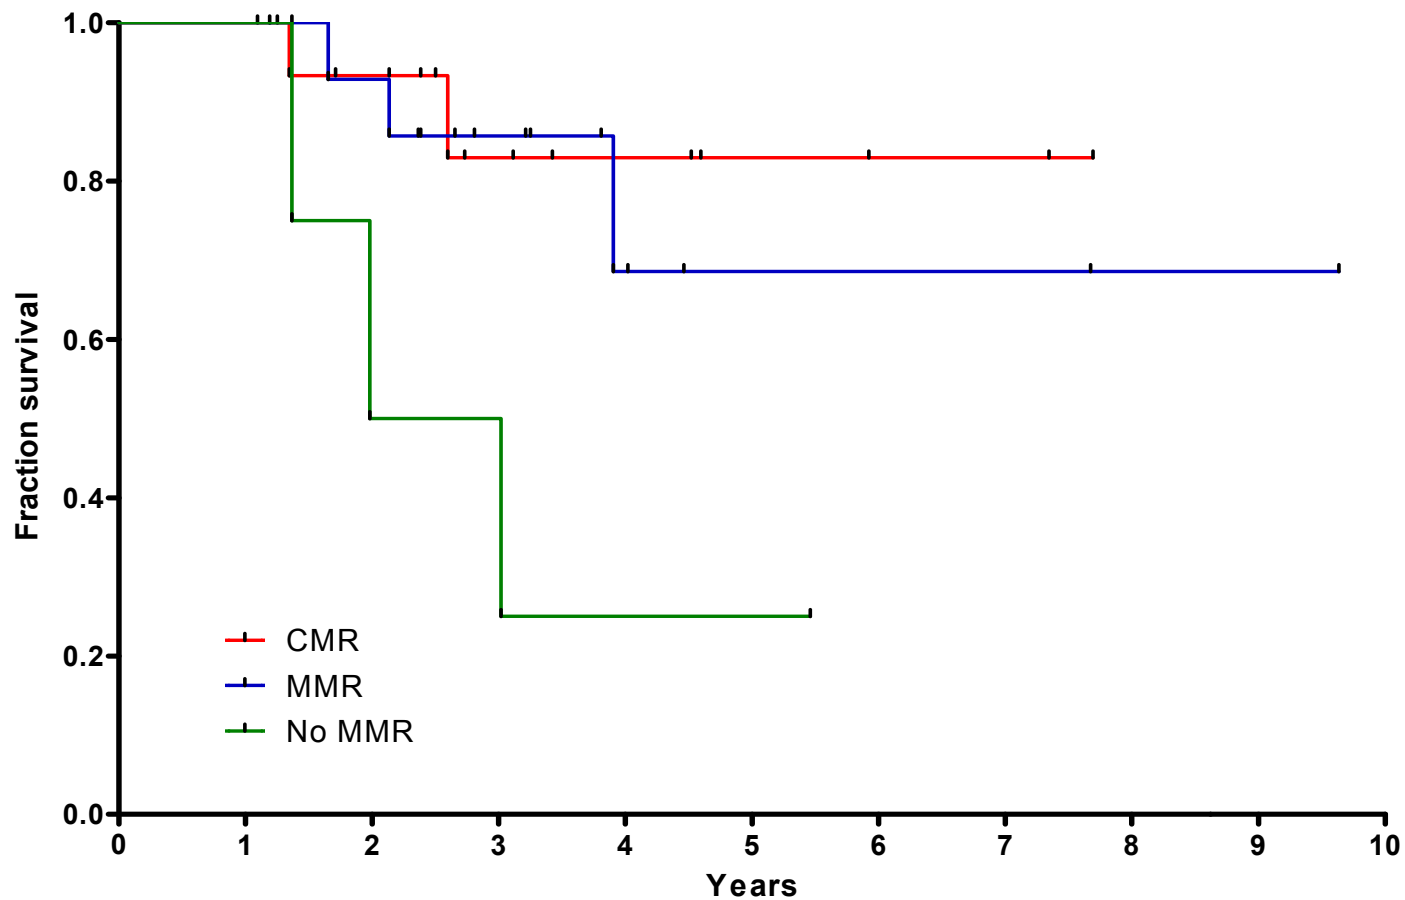

**Supplemental Table 2** - Kinetics of MRD in 44 patients who had at least one positive test by MFC or value of  $\geq 0.1$  by PCR for *BCR-ABL* between CR and 12 months after therapy.

| HCVAD+Imatinib |             | CR   | 3 mos     | 6 mos | 9 mos   | 12 mos  | Relapse Status  | Vital Status    |
|----------------|-------------|------|-----------|-------|---------|---------|-----------------|-----------------|
|                |             |      |           |       |         |         | Time from start | Time from start |
| Pt 1           | BCR-ABL     | Pos  | Pos       | Pos   | Pos     | ND      | Relapse         | Died            |
|                | IGH         | Neg  | Neg       | ND    | Neg     | ND      | 38 mos          | 46 mos          |
|                | MFC         | Neg  | Neg       | Neg   | Neg     | ND      |                 |                 |
|                | Cyto (%Ph+) | Neg  | Neg       | Neg   | 25      | ND      |                 |                 |
|                | FISH (%Ph+) | ND   | Neg       | Neg   | 26.5    | ND      |                 |                 |
| Pt 2           | BCR-ABL     | Pos  | ND        | Pos   | CMR     | MMR     | Relapse         | Died            |
|                | IGH         | Pos  | ND        | Neg   | Neg     | Neg     | 20 mos          | 21 mos          |
|                | MFC         | 1.2  | Neg       | ND    | Neg     | Neg     |                 |                 |
|                | Cyto (%Ph+) | Neg  | ND        | Neg   | Neg     | Neg     |                 |                 |
|                | FISH (%Ph+) | Neg  | ND        | Neg   | Neg     | Neg     |                 |                 |
| Pt 3           | BCR-ABL     | Pos  | MMR       | ND    | Relapse |         | Relapse         | Died            |
|                | IGH         | Neg  | Neg       | Neg   |         |         | 9 mos           | 15 mos          |
|                | MFC         | Neg  | 0.02-0.04 | Neg   |         |         |                 |                 |
|                | Cyto (%Ph+) | Neg  | Neg       | Neg   |         |         |                 |                 |
|                | FISH (%Ph+) | Neg  | Neg       | 2.5   |         |         |                 |                 |
| Pt 4           | BCR-ABL     | Pos  | MMR       | MMR   | MMR     | MMR     | Relapse         | Died            |
|                | IGH         | Pos  | Pos       | Pos   | Neg     | Neg     | 43 mos          | 47 mos          |
|                | MFC         | ND   | ND        | Neg   | Pos     | Pos     |                 |                 |
|                | Cyto (%Ph+) | Neg  | Neg       | Neg   | Neg     | Neg     |                 |                 |
|                | FISH (%Ph+) | Neg  | Neg       | Neg   | Neg     | Neg     |                 |                 |
| Pt 5           | BCR-ABL     | Pos  | CMR       | CMR   | CMR     | MMR     | Relapse         | Died            |
|                | IGH         | Pos  | Neg       | Neg   | Neg     | Neg     | 16 mos          | 26 mos          |
|                | MFC         | Pos  | ND        | Neg   | Neg     | 0.13    |                 |                 |
|                | Cyto (%Ph+) | Neg  | Neg       | Neg   | Neg     | Neg     |                 |                 |
|                | FISH (%Ph+) | 1.5  | Neg       | Neg   | ND      | ND      |                 |                 |
| Pt 6           | BCR-ABL     | MMR  | MMR       | ND    | MMR     | Relapse | Relapse         | Died            |
|                | IGH         | Neg  | Neg       | ND    | Neg     |         | 12 mos          | 12 mos          |
|                | MFC         | 0.01 | Neg       | ND    | Neg     |         |                 |                 |
|                | Cyto (%Ph+) | Neg  | Neg       | ND    | Neg     |         |                 |                 |
|                | FISH (%Ph+) | ND   | Neg       | ND    | ND      |         |                 |                 |
| Pt 7           | BCR-ABL     | CMR  | ND        | ND    | ND      | ND      | Relapse         | Died            |
|                | IGH         | Neg  | ND        | ND    | ND      | ND      | 22 mos          | 23 mos          |
|                | MFC         | Pos  | ND        | ND    | ND      | ND      |                 |                 |
|                | Cyto (%Ph+) | Neg  | ND        | ND    | ND      | ND      |                 |                 |
|                | FISH (%Ph+) | 8    | ND        | ND    | ND      | ND      |                 |                 |
| Pt 8           | BCR-ABL     | Pos  | Pos       | Pos   | Pos     | Pos     |                 | Died in CR      |
|                | IGH         | Neg  | Neg       | Neg   | Neg     | Neg     |                 | 16 mos          |
|                | MFC         | Neg  | Neg       | Neg   | Neg     | Neg     |                 |                 |
|                | Cyto (%Ph+) | 10   | 5         | 15    | 5       | 10      |                 |                 |
|                | FISH (%Ph+) | 4.5  | 4         | 11    | 6.5     | 4.5     |                 |                 |
| Pt 9           | BCR-ABL     | Pos  | Pos       | Pos   | Died    |         |                 | Died in CR      |
|                | IGH         | ND   | Neg       | Neg   |         |         |                 | 6 mos           |
|                | MFC         | 0.12 | Neg       | Neg   |         |         |                 |                 |
|                | Cyto (%Ph+) | Neg  | Neg       | Neg   |         |         |                 |                 |
|                | FISH (%Ph+) | ND   | Neg       | Neg   |         |         |                 |                 |
| Pt 10          | BCR-ABL     | ND   | ND        | Pos   | Died    |         |                 | Died in CR      |
|                | IGH         | Neg  | ND        | Neg   |         |         |                 | 6 mos           |
|                | MFC         | Neg  | ND        | Neg   |         |         |                 |                 |
|                | Cyto (%Ph+) | ND   | ND        | Neg   |         |         |                 |                 |
|                | FISH (%Ph+) | ND   | ND        | Neg   |         |         |                 |                 |

| HCVAD+Imatinib<br>cont. |             | CR   | 3 mos | 6 mos | 9 mos | 12 mos | Relapse Status<br>Time from start | Vital Status<br>Time from start |
|-------------------------|-------------|------|-------|-------|-------|--------|-----------------------------------|---------------------------------|
| Pt 11                   | BCR-ABL     | Pos  | MMR   | MMR   | MMR   | Died   |                                   | Died in CR                      |
|                         | IGH         | Neg  | Neg   | Pos   | ND    |        |                                   | 12 mos                          |
|                         | MFC         | Neg  | Neg   | Neg   | Neg   |        |                                   |                                 |
|                         | Cyto (%Ph+) | Neg  | Neg   | Neg   | Neg   |        |                                   |                                 |
|                         | FISH (%Ph+) | 2.5  | Neg   | Neg   | ND    |        |                                   |                                 |
| Pt 12                   | BCR-ABL     | Pos  | MMR   | Pos   | ND    | ND     |                                   | Alive                           |
|                         | IGH         | Neg  | ND    | ND    | ND    | ND     |                                   |                                 |
|                         | MFC         | ND   | ND    | ND    | ND    | ND     |                                   |                                 |
|                         | Cyto (%Ph+) | 20   | Neg   | 21    |       |        |                                   |                                 |
|                         | FISH (%Ph+) | 13.5 | Neg   | 11    |       |        |                                   |                                 |
| Pt 13                   | BCR-ABL     | MMR  | MMR   | MMR   | MMR   | Pos    |                                   | Alive                           |
|                         | IGH         | Neg  | Neg   | Neg   | Neg   | Neg    |                                   |                                 |
|                         | MFC         | ND   | Neg   | Neg   | ND    | Neg    |                                   |                                 |
|                         | Cyto (%Ph+) | Neg  | Neg   | Neg   | Neg   | Neg    |                                   |                                 |
|                         | FISH (%Ph+) | Neg  | Neg   | Neg   | Neg   | Neg    |                                   |                                 |
| Pt 14                   | BCR-ABL     | MMR  | CMR   | CMR   | ND    | CMR    |                                   | Alive                           |
|                         | IGH         | Neg  | Neg   | Neg   | ND    | ND     |                                   |                                 |
|                         | MFC         | ND   | Neg   | Pos   | ND    | ND     |                                   |                                 |
|                         | Cyto (%Ph+) | Neg  | Neg   | Neg   | ND    | Neg    |                                   |                                 |
|                         | FISH (%Ph+) | Neg  | Neg   | Neg   | ND    | Neg    |                                   |                                 |
| Pt 15                   | BCR-ABL     | Pos  | MMR   | MMR   | ND    | MMR    |                                   | Alive                           |
|                         | IGH         | Neg  | Neg   | ND    | ND    | Neg    |                                   |                                 |
|                         | MFC         | Neg  | Neg   | Neg   | ND    | Neg    |                                   |                                 |
|                         | Cyto (%Ph+) | Neg  | Neg   | Neg   | ND    | Neg    |                                   |                                 |
|                         | FISH (%Ph+) | Neg  | Neg   | ND    | ND    | ND     |                                   |                                 |
| Pt 16                   | BCR-ABL     | ND   | ND    | CMR   | CMR   | CMR    |                                   | Alive                           |
|                         | IGH         | ND   | ND    | Neg   | Neg   | Neg    |                                   |                                 |
|                         | MFC         | 0.03 | ND    | Neg   | Neg   | Neg    |                                   |                                 |
|                         | Cyto (%Ph+) | Neg  | ND    | Neg   | Neg   | Neg    |                                   |                                 |
|                         | FISH (%Ph+) | ND   | ND    | Neg   | Neg   | ND     |                                   |                                 |

| HCVAD+Dasatinib |             | CR   | 3 mos      | 6 mos | 9 mos   | 12 mos  | Relapse Status  | Vital Status    |
|-----------------|-------------|------|------------|-------|---------|---------|-----------------|-----------------|
|                 |             |      |            |       |         |         | Time from start | Time from start |
| Pt 17           | BCR-ABL     | Pos  | MMR        | MMR   | CMR     | Pos     | Relapse         | Died            |
|                 | IGH         | ND   | Neg        | Neg   | Neg     | Neg     | 14 mos          | 24 mos          |
|                 | MFC         | 0.21 | Neg        | Neg   | Neg     | 0.6     |                 |                 |
|                 | Cyto (%Ph+) | Neg  | Neg        | Neg   | Neg     | Neg     |                 |                 |
|                 | FISH (%Ph+) | ND   | ND         | ND    | ND      | ND      |                 |                 |
| Pt 18           | BCR-ABL     | MMR  | MMR        | CMR   | CMR     | Pos     | Relapse         | Died            |
|                 | IGH         | Pos  | ND         | ND    | ND      | Susp    | 17 mos          | 36 mos          |
|                 | MFC         | 0.01 | ND         | Neg   | Neg     | 0.08    |                 |                 |
|                 | Cyto (%Ph+) | Neg  | ND         | Neg   | Neg     | Neg     |                 |                 |
|                 | FISH (%Ph+) | Neg  | ND         | ND    | ND      | ND      |                 |                 |
| Pt 19           | BCR-ABL     | Pos  | ND         | ND    | Relapse |         | Relapse         | Died            |
|                 | IGH         | Pos  | Pos        | ND    |         |         | 8 mos           | 11 mos          |
|                 | MFC         | 0.04 | 0.04       | ND    |         |         |                 |                 |
|                 | Cyto (%Ph+) | Neg  | Neg        | ND    |         |         |                 |                 |
|                 | FISH (%Ph+) | ND   | ND         | ND    |         |         |                 |                 |
| Pt 20           | BCR-ABL     | Pos  | MMR        | Pos   | ND      | ND      | Relapse         | Alive           |
|                 | IGH         | Neg  | Neg        | Neg   | ND      | ND      | 19 mos          |                 |
|                 | MFC         | Neg  | Neg        | Neg   | ND      | ND      |                 |                 |
|                 | Cyto (%Ph+) | ND   | Neg        | Neg   | ND      | ND      |                 |                 |
|                 | FISH (%Ph+) | ND   | ND         | ND    | ND      | ND      |                 |                 |
| Pt 21           | BCR-ABL     | Pos  | MMR        | MMR   | MMR     | MMR     | Relapse         | Alive           |
|                 | IGH         | Neg  | Neg        | ND    | ND      | Neg     | 29 mos          |                 |
|                 | MFC         | Neg  | Neg        | Neg   | Neg     | Neg     |                 |                 |
|                 | Cyto (%Ph+) | Neg  | ND         | ND    | ND      | Neg     |                 |                 |
|                 | FISH (%Ph+) | Neg  | ND         | ND    | ND      | ND      |                 |                 |
| Pt 22           | BCR-ABL     | Pos  | MMR        | MMR   | MMR     | Relapse | Relapse         | Alive           |
|                 | IGH         | ND   | Neg        | Neg   | ND      |         | 12 mos          |                 |
|                 | MFC         | ND   | Neg        | Neg   | ND      |         |                 |                 |
|                 | Cyto (%Ph+) | Neg  | Neg        | ND    | ND      |         |                 |                 |
|                 | FISH (%Ph+) | ND   | ND         | ND    | ND      |         |                 |                 |
| Pt 23           | BCR-ABL     | Pos  | Pos        | ND    | Pos     | Died    |                 | Died in CR      |
|                 | IGH         | Neg  | ND         | ND    | ND      |         |                 | 12 mos          |
|                 | MFC         | Neg  | Neg        | ND    | ND      |         |                 |                 |
|                 | Cyto (%Ph+) | 15   | 5          | ND    | 5       |         |                 |                 |
|                 | FISH (%Ph+) | ND   | ND         | ND    | 4       |         |                 |                 |
| Pt 24           | BCR-ABL     | Pos  | MMR        | MMR   | MMR     | Died    |                 | Died in CR      |
|                 | IGH         | ND   | Neg        | Neg   | ND      |         |                 | 10 mos          |
|                 | MFC         | ND   | Neg        | Neg   | ND      |         |                 |                 |
|                 | Cyto (%Ph+) | Neg  | Neg        | Neg   | ND      |         |                 |                 |
|                 | FISH (%Ph+) | 4.5  | Neg        | Neg   | ND      |         |                 |                 |
| Pt 25           | BCR-ABL     | Pos  | MMR        | Died  |         |         |                 | Died in CR      |
|                 | IGH         | ND   | Pos        |       |         |         |                 | 6 mos           |
|                 | MFC         | 2.5  | 0.005-0.01 |       |         |         |                 |                 |
|                 | Cyto (%Ph+) | Neg  | Neg        |       |         |         |                 |                 |
|                 | FISH (%Ph+) | Neg  | ND         |       |         |         |                 |                 |
| Pt 26           | BCR-ABL     | MMR  | Died       |       |         |         |                 | Died in CR      |
|                 | IGH         | Pos  |            |       |         |         |                 | 2 mos           |
|                 | MFC         | 0.04 |            |       |         |         |                 |                 |
|                 | Cyto (%Ph+) | Neg  |            |       |         |         |                 |                 |
|                 | FISH (%Ph+) | Neg  |            |       |         |         |                 |                 |



| HCVAD+Dasatinib<br>cont. |             | CR   | 3 mos | 6 mos | 9 mos | 12 mos | Relapse Status<br>Time from start | Vital Status<br>Time from start |
|--------------------------|-------------|------|-------|-------|-------|--------|-----------------------------------|---------------------------------|
| Pt 27                    | BCR-ABL     | MMR  | Died  |       |       |        |                                   | Died in CR                      |
|                          | IGH         | Neg  |       |       |       |        |                                   | 1 mos                           |
|                          | MFC         | 0.06 |       |       |       |        |                                   |                                 |
|                          | Cyto (%Ph+) | ND   |       |       |       |        |                                   |                                 |
|                          | FISH (%Ph+) | Neg  |       |       |       |        |                                   |                                 |
| Pt 28                    | BCR-ABL     | ND   | Died  |       |       |        |                                   | Died in CR                      |
|                          | IGH         | Neg  |       |       |       |        |                                   | 2 mos                           |
|                          | MFC         | 0.02 |       |       |       |        |                                   |                                 |
|                          | Cyto (%Ph+) | Neg  |       |       |       |        |                                   |                                 |
|                          | FISH (%Ph+) | Neg  |       |       |       |        |                                   |                                 |
| Pt 29                    | BCR-ABL     | MMR  | MMR   | MMR   | MMR   | MMR    |                                   | Alive                           |
|                          | IGH         | Neg  | ND    | Neg   | ND    | ND     |                                   |                                 |
|                          | MFC         | 0.02 | Neg   | Neg   | Neg   | ND     |                                   |                                 |
|                          | Cyto (%Ph+) | Neg  | Neg   | ND    | ND    | ND     |                                   |                                 |
|                          | FISH (%Ph+) | Neg  | ND    | ND    | ND    | ND     |                                   |                                 |
| Pt 30                    | BCR-ABL     | Pos  | MMR   | MMR   | ND    | CMR    |                                   | Alive                           |
|                          | IGH         | ND   | ND    | ND    | ND    | ND     |                                   |                                 |
|                          | MFC         | 0.2  | ND    | Neg   | ND    | Neg    |                                   |                                 |
|                          | Cyto (%Ph+) | 5    | ND    | Neg   | ND    | Neg    |                                   |                                 |
|                          | FISH (%Ph+) | 2    | ND    | Neg   | ND    | Neg    |                                   |                                 |
| Pt 31                    | BCR-ABL     | ND   | MMR   | MMR   | MMR   | MMR    |                                   | Alive                           |
|                          | IGH         | ND   | Pos   | Neg   | Neg   | Neg    |                                   |                                 |
|                          | MFC         | ND   | Neg   | Neg   | Neg   | Neg    |                                   |                                 |
|                          | Cyto (%Ph+) | Neg  | Neg   | Neg   | Neg   | Neg    |                                   |                                 |
|                          | FISH (%Ph+) | ND   | ND    | ND    | ND    | Neg    |                                   |                                 |
| Pt 32                    | BCR-ABL     | Pos  | Pos   | ND    | MMR   | MMR    |                                   | Alive                           |
|                          | IGH         | Neg  | ND    | ND    | ND    | ND     |                                   |                                 |
|                          | MFC         | Neg  | Neg   | ND    | Neg   | Neg    |                                   |                                 |
|                          | Cyto (%Ph+) | Neg  | Neg   | ND    | Neg   | Neg    |                                   |                                 |
|                          | FISH (%Ph+) | ND   | ND    | ND    | ND    | ND     |                                   |                                 |
| Pt 33                    | BCR-ABL     | Pos  | Pos   | MMR   | CMR   | CMR    |                                   | Alive                           |
|                          | IGH         | ND   | ND    | Neg   | ND    | ND     |                                   |                                 |
|                          | MFC         | Neg  | Neg   | Neg   | Neg   | Neg    |                                   |                                 |
|                          | Cyto (%Ph+) | ND   | ND    | Neg   | Neg   | Neg    |                                   |                                 |
|                          | FISH (%Ph+) | 3.5  | ND    | Neg   | Neg   | ND     |                                   |                                 |
| Pt 34                    | BCR-ABL     | Pos  | MMR   | Pos   | Pos   | MMR    |                                   | Alive                           |
|                          | IGH         | Pos  | ND    | ND    | ND    | ND     |                                   |                                 |
|                          | MFC         | Pos  | ND    | ND    | ND    | Neg    |                                   |                                 |
|                          | Cyto (%Ph+) | Neg  | ND    | ND    | Neg   | ND     |                                   |                                 |
|                          | FISH (%Ph+) | Neg  | ND    | ND    | ND    | ND     |                                   |                                 |
| Pt 35                    | BCR-ABL     | MMR  | CMR   | MMR   | CMR   | CMR    |                                   | Alive                           |
|                          | IGH         | Neg  | Neg   | Neg   | Neg   | Neg    |                                   |                                 |
|                          | MFC         | 0.05 | 0.001 | Neg   | Neg   | Neg    |                                   |                                 |
|                          | Cyto (%Ph+) | Neg  | Neg   | Neg   | Neg   | Neg    |                                   |                                 |
|                          | FISH (%Ph+) | ND   | Neg   | ND    | ND    | ND     |                                   |                                 |
| Pt 36                    | BCR-ABL     | Pos  | ND    | ND    | ND    | ND     |                                   | Alive                           |
|                          | IGH         | Pos  | Pos   | ND    | ND    | ND     |                                   |                                 |
|                          | MFC         | 0.32 | 0.02  | ND    | ND    | ND     |                                   |                                 |
|                          | Cyto (%Ph+) | 5    | Neg   | ND    | ND    | ND     |                                   |                                 |
|                          | FISH (%Ph+) | ND   | ND    | ND    | ND    | ND     |                                   |                                 |

| HCVAD+Dasatinib<br>cont. |             | CR    | 3 mos | 6 mos | 9 mos | 12 mos | Relapse Status<br>Time from start | Vital Status<br>Time from start |
|--------------------------|-------------|-------|-------|-------|-------|--------|-----------------------------------|---------------------------------|
| Pt 37                    | BCR-ABL     | Pos   | MMR   | MMR   | MMR   | MMR    |                                   | Alive                           |
|                          | IGH         | Neg   | Neg   | Pos   | Neg   | Neg    |                                   |                                 |
|                          | MFC         | Neg   | Neg   | Neg   | Neg   | Neg    |                                   |                                 |
|                          | Cyto (%Ph+) | Neg   | Neg   | Neg   | Neg   | Neg    |                                   |                                 |
|                          | FISH (%Ph+) | 4.6   | ND    | ND    | ND    | ND     |                                   |                                 |
| Pt 38                    | BCR-ABL     | Pos   | CMR   | CMR   | MMR   | ND     |                                   | Alive                           |
|                          | IGH         | Pos   | Neg   | ND    | ND    | ND     |                                   |                                 |
|                          | MFC         | Pos   | Neg   | Neg   | Neg   | Neg    |                                   |                                 |
|                          | Cyto (%Ph+) | Neg   | Neg   | Neg   | ND    | Neg    |                                   |                                 |
|                          | FISH (%Ph+) | 4     | ND    | Neg   | ND    | Neg    |                                   |                                 |
| Pt 39                    | BCR-ABL     | Pos   | MMR   | MMR   | CMR   | ND     |                                   | Alive                           |
|                          | IGH         | ND    | ND    | ND    | ND    | ND     |                                   |                                 |
|                          | MFC         | Neg   | Neg   | Neg   | Neg   | ND     |                                   |                                 |
|                          | Cyto (%Ph+) | Neg   | ND    | Neg   | Neg   | Neg    |                                   |                                 |
|                          | FISH (%Ph+) | Neg   | ND    | Neg   | Neg   | ND     |                                   |                                 |
| Pt 40                    | BCR-ABL     | ND    | MMR   | MMR   | MMR   | MMR    |                                   | Alive                           |
|                          | IGH         | Pos   | Neg   | ND    | Neg   | Neg    |                                   |                                 |
|                          | MFC         | Pos   | Neg   | ND    | Neg   | Neg    |                                   |                                 |
|                          | Cyto (%Ph+) | Neg   | Neg   | ND    | Neg   | Neg    |                                   |                                 |
|                          | FISH (%Ph+) | ND    | ND    | ND    | ND    | ND     |                                   |                                 |
| Pt 41                    | BCR-ABL     | MMR   | CMR   | CMR   | ND    | CMR    |                                   | Alive                           |
|                          | IGH         | Neg   | Neg   | Neg   | Neg   | Pos    |                                   |                                 |
|                          | MFC         | <0.01 | Neg   | Neg   | Neg   | Neg    |                                   |                                 |
|                          | Cyto (%Ph+) | Neg   | Neg   | Neg   | Neg   | Neg    |                                   |                                 |
|                          | FISH (%Ph+) | ND    | ND    | ND    | ND    | ND     |                                   |                                 |
| Pt 42                    | BCR-ABL     | ND    | CMR   | MMR   | ND    | CMR    |                                   | Alive                           |
|                          | IGH         | Neg   | ND    | Neg   | ND    | Neg    |                                   |                                 |
|                          | MFC         | 0.023 | Neg   | Neg   | ND    | Neg    |                                   |                                 |
|                          | Cyto (%Ph+) | ND    | Neg   | Neg   | ND    | Neg    |                                   |                                 |
|                          | FISH (%Ph+) | ND    | ND    | ND    | ND    | ND     |                                   |                                 |
| Pt 43                    | BCR-ABL     | MMR   | ND    | ND    | ND    | ND     |                                   | Alive                           |
|                          | IGH         | Pos   | ND    | ND    | ND    | ND     |                                   |                                 |
|                          | MFC         | 0.015 | ND    | ND    | ND    | ND     |                                   |                                 |
|                          | Cyto (%Ph+) | Neg   | ND    | ND    | ND    | ND     |                                   |                                 |
|                          | FISH (%Ph+) | Neg   | ND    | ND    | ND    | ND     |                                   |                                 |
| Pt 44                    | BCR-ABL     | MMR   | ND    | ND    | ND    | ND     |                                   | Alive                           |
|                          | IGH         | Neg   | Neg   | ND    | ND    | ND     |                                   |                                 |
|                          | MFC         | 0.02  | Neg   | ND    | ND    | ND     |                                   |                                 |
|                          | Cyto (%Ph+) | Neg   | Neg   | ND    | ND    | ND     |                                   |                                 |
|                          | FISH (%Ph+) | ND    | Neg   | ND    | ND    | ND     |                                   |                                 |
